# Supplementary material
Source: publisher figshare collection journal article supplement (https://acs.figshare.com/ndownloader/files/3964717)
Supplement: Supplementary file 1 [file 3964717]

**Supporting Information** for the article "Confocal Raman Microscopy for *In-Situ* Detection of Solid-Phase Extraction of Pyrene into Single C-18 Silica Particles"

Jay P. Kitt and Joel M. Harris  
Department of Chemistry  
University of Utah  
315 South 1400 East  
Salt Lake City, UT 84112-0850

|                  |                                                                                         |        |
|------------------|-----------------------------------------------------------------------------------------|--------|
| <b>Contents:</b> | Diagram of Microscopy Well Cell and Flow Cell. ....                                     | Page 2 |
|                  | Baseline Correction and Gaussian Fitting of Raman Scattering Data. ....                 | Page 3 |
|                  | Linear Response of CH <sub>2</sub> Twist Scattering with Hydrocarbon Chain Length. .... | Page 4 |

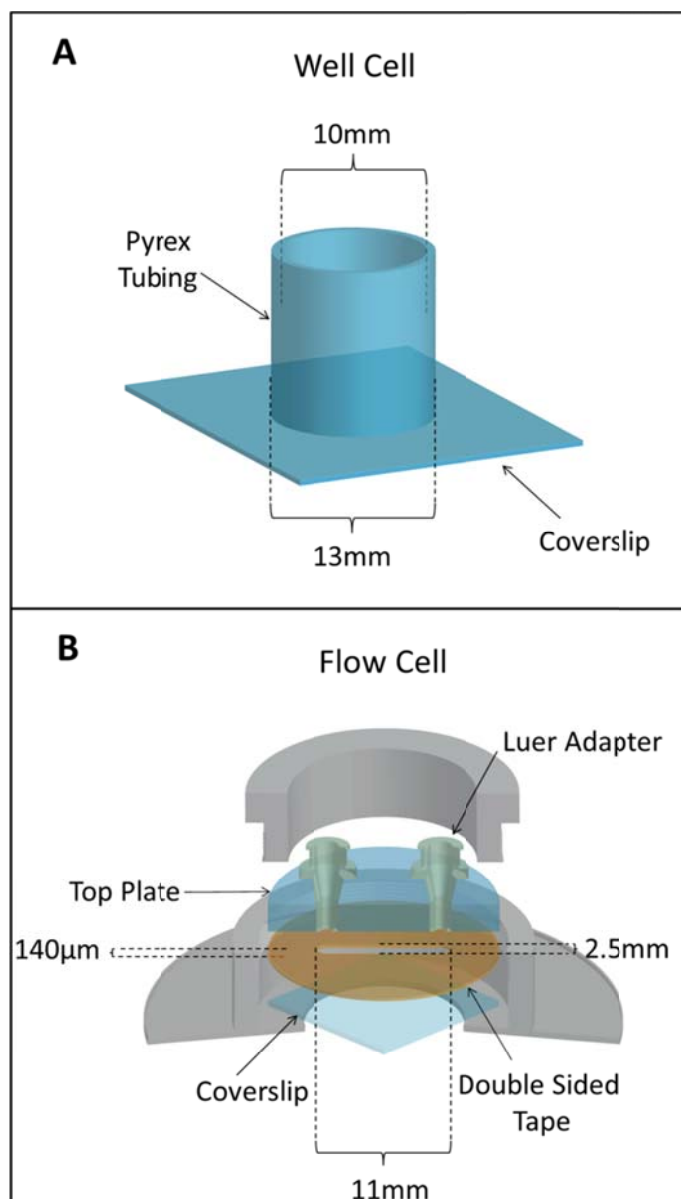

**Figure S-1:** Raman microscopy cell designs. **A.** Well cell for measuring solution-phase standards. **B.** Flow cell for *in-situ* measurements of pre-concentration into surface-attached C<sub>18</sub> particles.

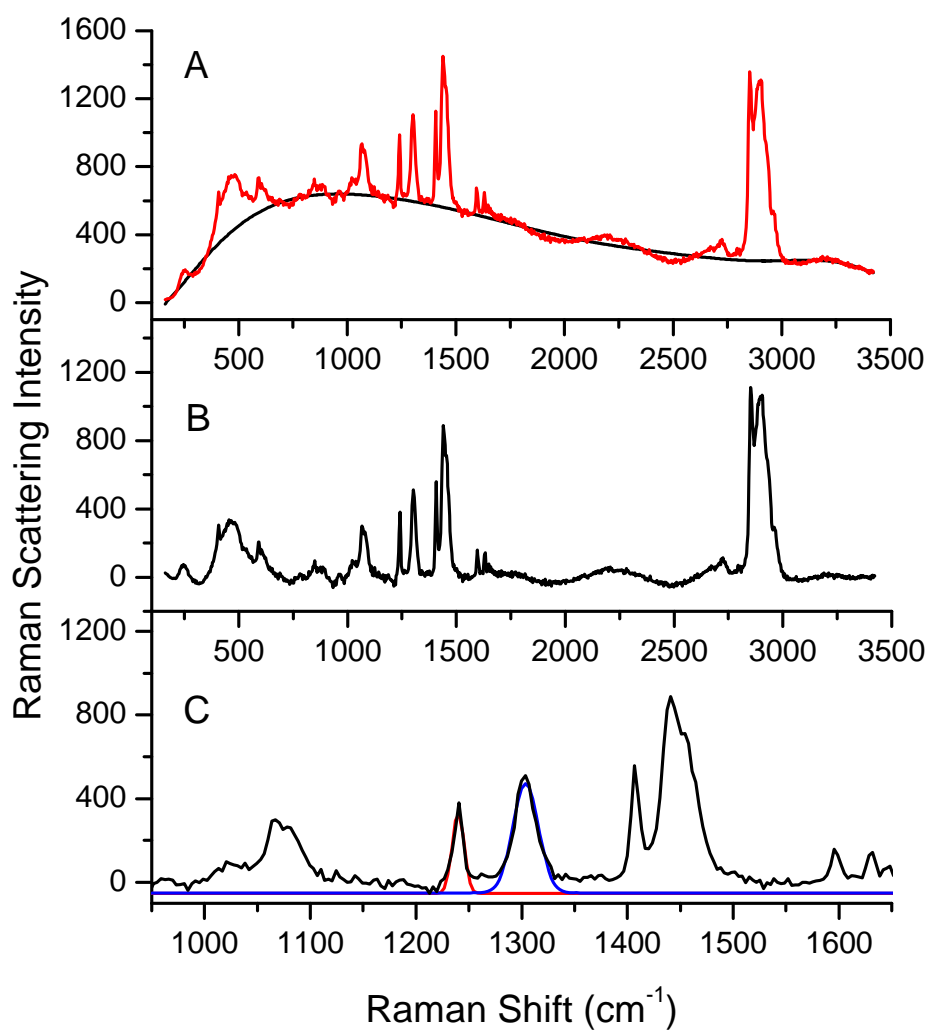

**Figure S-2:** Raman spectra of pyrene within a C<sub>18</sub> particle. **A.** Spectrum prior to polynomial baseline correction. **B.** Spectrum following baseline correction. **C.** Spectroscopic peaks fitted to a Gaussian shapes. The peak at 1241cm<sup>-1</sup> corresponds to the pyrene ring stretching mode. The peak at 1303cm<sup>-1</sup> corresponds to the CH<sub>2</sub> twisting mode from the surface C<sub>18</sub> chains.

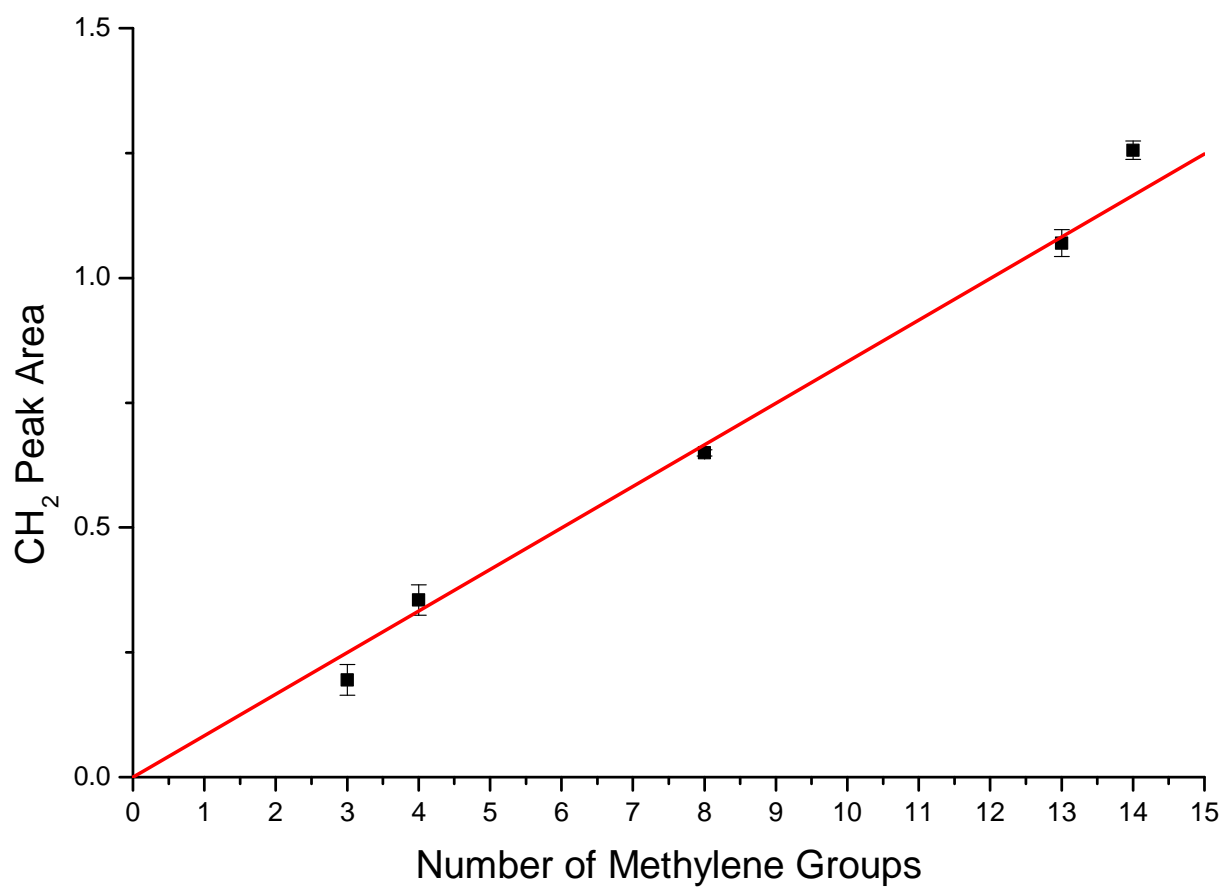

**Figure S-3:** The normalized CH<sub>2</sub> peak area versus number of methylene groups in the linear hydrocarbon, together with a least-squares fit to a straight line with no intercept.
